# Supplementary material
Source: publisher figshare collection journal article supplement (https://diabetesjournals.figshare.com/articles/dataset/_/16873354)
Supplement: Supplementary file 1 [file 1]

SUPPLEMENTAL TABLE. Prevalence of Household Food Insecurity among Youth and Young Adults with Type 1 and Type 2 Diabetes by Participant Household Characteristics

|                          | Overall (N=2561)<br>% | Type 1 (N=2177)<br>% | Type 2 (N=384)<br>% |
|--------------------------|-----------------------|----------------------|---------------------|
| Age at study visit       | p=0.0012              | p=0.0723             | p=0.3719            |
| 10-17                    | 16.6                  | 15.9                 | 36.4                |
| 18-25                    | 19.2                  | 17.5                 | 27.9                |
| 26-35                    | 25.0                  | 21.5                 | 34.3                |
| Sex                      | p=0.0031              | p=0.0387             | p=0.2374            |
| Female                   | 21.8                  | 19.4                 | 32.7                |
| Male                     | 17.1                  | 16.0                 | 26.8                |
| Race/Ethnicity           | p<0.0001              | p<0.0001             | p=0.1162            |
| Non-Hispanic White       | 16.8                  | 15.6                 | 41.7                |
| Non-Hispanic Black       | 30.0                  | 31.0                 | 28.4                |
| Hispanic                 | 18.7                  | 16.6                 | 25.3                |
| Other                    | 25.7                  | 20.6                 | 33.3                |
| Highest parent education | p<0.0001              | p<0.0001             | p=0.8791            |
| Bachelor's or higher     | 12.1                  | 11.1                 | 30.6                |
| Less than Bachelor's     | 26.5                  | 25.0                 | 31.6                |
| Household income         | p<0.0001              | p<0.0001             | p<0.0001            |
| >=\$50,000               | 8.6                   | 8.7                  | 5.3                 |
| \$25,000-\$49,999        | 29.6                  | 27.0                 | 40.7                |
| <\$25,000                | 39.2                  | 37.3                 | 44.3                |
| Don't know/refused       | 17.3                  | 16.6                 | 19.6                |
| Health insurance         | p<0.0001              | p<0.0001             | p=0.2558            |
| Private                  | 14.9                  | 13.7                 | 26.8                |
| Medicaid/Medicare        | 34.3                  | 34.2                 | 35.4                |
| Other                    | 21.7                  | 21.2                 | 23.5                |
| None                     | 34.2                  | 31.4                 | 37.7                |
